# Supplementary material
Source: publisher figshare collection journal article supplement (https://acs.figshare.com/ndownloader/files/4378069)
Supplement: Supplementary file 1 [file 4378069]

## **Supporting Information**

### **Accelerated Continuous Flow RAFT Polymerization**

*Diehl C., Laurino P., Azzouz N. and Seeberger P.H.\**

Max Planck Institute of Colloids and Interfaces, Department of Biomolecular Systems

and

Freie Universität Berlin, Institute for Chemistry and Biochemistry

Arnimallee 22, 14195 Berlin, Germany

\* Corresponding author: email Seeberger@mpikg.mpg.de

#### **Table of contents**

- 1. NMR and SEC data of PNIPAM**
- 2. Data of kinetics studies**
- 3. Mannose functionalized polymer**
- 4. Microarray experiments**

## 1. NMR and SEC data of PNIPAM

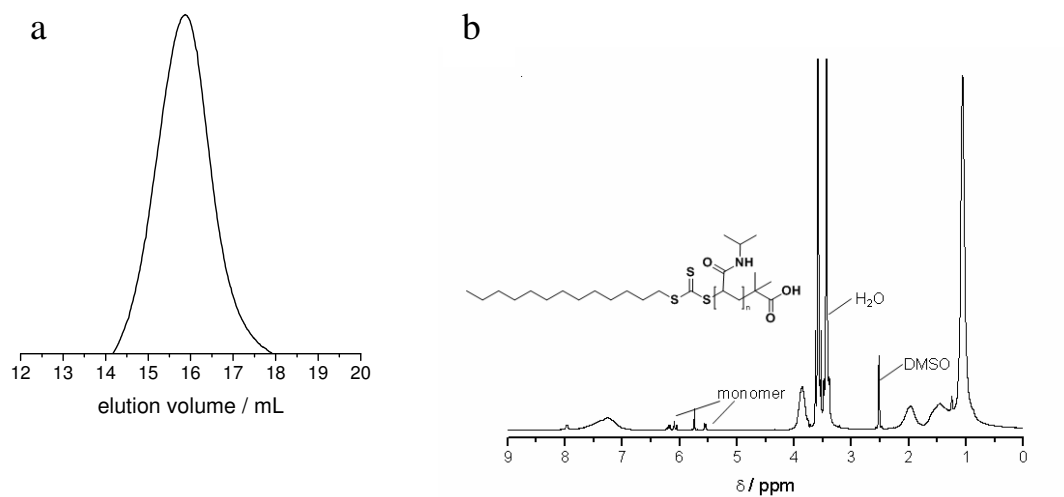

**SI 1. Exemplary (a) SEC elugram in NMP and (b)  $^1\text{H}$  NMR in DMSO  $\text{d}_6$  of PNIPAM obtained after 1 h at 90 °C in continuous flow ( $n = 200$ , yield 88 %).**

## 2. Data of kinetics studies

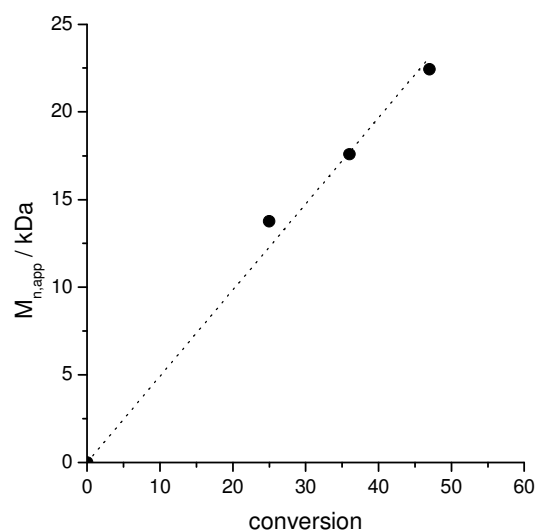

**SI 2. Apparent molecular weight  $M_{n,app}$  of PNIPAM obtained at 90 °C in continuous flow ( $n = 1000$ ) plotted against the conversion.**

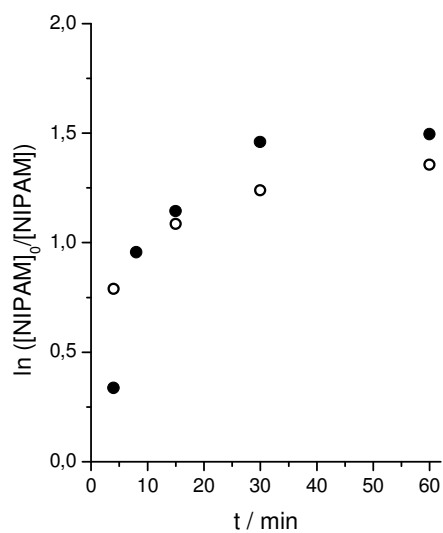

**SI 3. Pseudo first-order kinetic plots of the polymerization of NIPAM in continuous flow ( $n = 200$ ) at 90 °C (●) and 130 °C (○).**

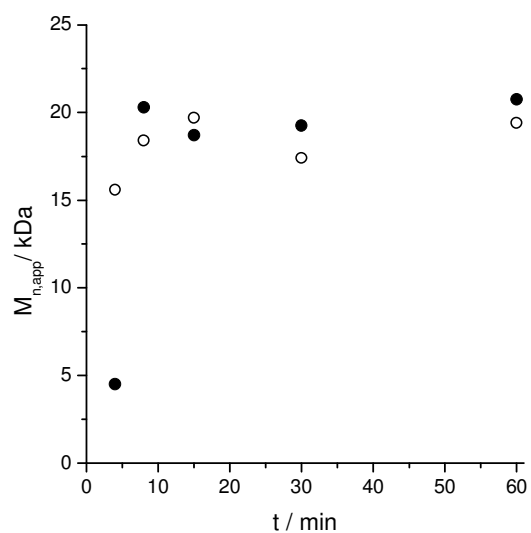

**SI 4. Evolution of apparent molecular weight of PNIPAM polymerized at 90 °C and  $n = 200$  in continuous flow (●) and under microwave irradiation (○).**

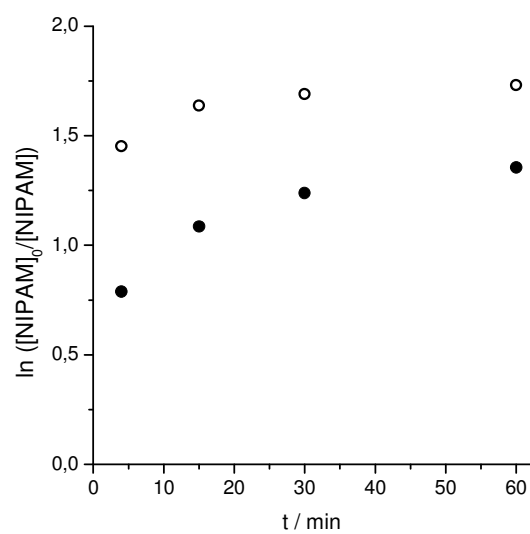

**SI 5. Pseudo first-order kinetic plots of the polymerization of NIPAM at 130 °C in continuous flow (●) and under microwave irradiation (○).**

### 3. Mannose functionalized polymer

*Functionalization of CTA-PNIPAM-COOH with acetylated mannose.* A mixture of CTA-PNIPAM-COOH (40 mg; 2  $\mu$ mol) and N,N-Diisopropylethylamine (DIPEA, 0.1 mmol, 12.92 mg), benzotriazol-1-yl-oxytripyrrolidinophosphonium hexafluorophosphate (PyBOP, 0.1 mmol, 50.6 mg), 1-Hydroxybenzotriazole (HOBt, 0.1 mmol, 15.30 mg), DMF/DCM (1:1, 5 mL), Mannose-NH<sub>2</sub> (0.1 mmol, 39.1 mg) dissolved in dried DMF was then added dropwise at 0 °C. The reaction mixture was then stirred at room temperature overnight. After dialysis against deionized water for 3 days, the final product (3) was recovered by freeze-drying from water (75%). <sup>1</sup>H NMR (400 MHz, CD<sub>3</sub>OD):  $\delta$ (ppm) = 7.8-7.0 (1H, NH), 4.75 (1H, HC-O, anomeric proton), 4.5-4 (1H, -N-CH<), 2.5-2 (1H, -C-CH-), 2-1.8 (2H, -CH<sub>2</sub>-C-), 1.6 (22H, C<sub>11</sub>H<sub>22</sub>, end group), 1.6-1.4 (6H, CH<sub>3</sub>-C-CH<sub>3</sub>).

*Hydrolysis of 3.* The functionalized PNIPAM (3, 1.5  $\mu$ mol, 30 mg) was hydrolyzed and deacetylated by a NaOH solution in methanol (3 mL, 1.0 M, 28%) under nitrogen in the presence of a small amount of EDTA (10 mg). After hydrolysis, the mixture was acidified by 88% formic acid and after dialysis against deionized water for 3 days, the final product (4) was recovered by freeze-drying from water (quant.). <sup>1</sup>H NMR (400 MHz, CDCl<sub>3</sub>):  $\delta$ (ppm) = 6.75-6.25 (1H, NH), 4.0-3.7 (1H, -N-CH<), 3.5 (1H, HC-O, anomeric proton), 4.2-3.8 (5H, mannose protons), 3.25-3 (1H, -N-CH<), 1.8-2.2 (1H, -C-CH-), 1.75-1.5 (2H, -CH<sub>2</sub>-C-), 1.2-0.8 (6H, CH<sub>3</sub>-C-CH<sub>3</sub>).

CD100\_PROTON\_28Jun10\_01

**a**

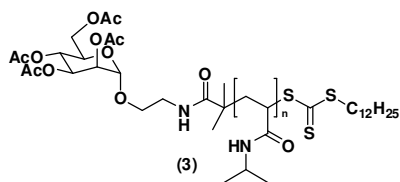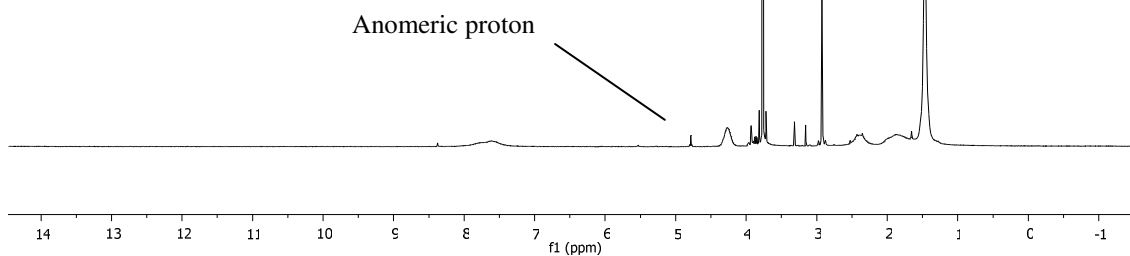

cd-109\_PROTON\_09Jul10\_01  
cd-109

**b**

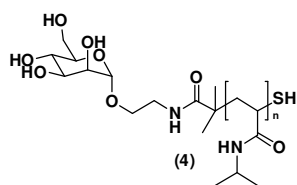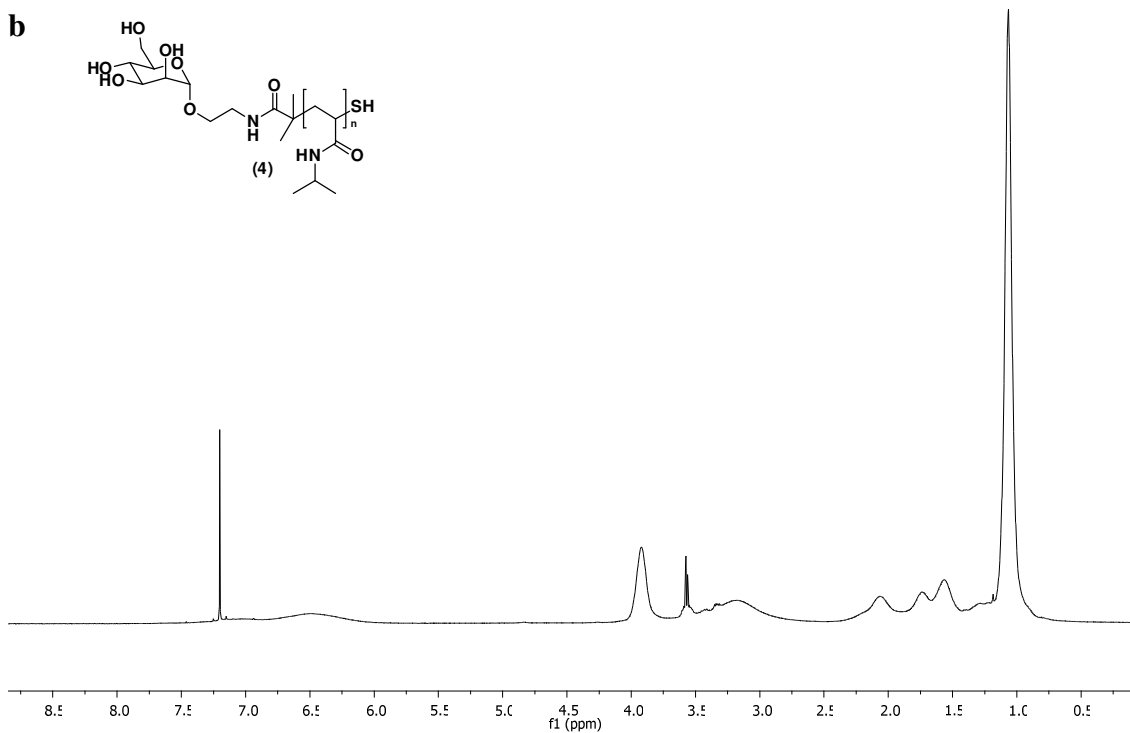

**SI6. (a)  $^1\text{H}$  NMR in DMSO  $d_6$  of PNIPAM-acetylated-mannose; (b)  $^1\text{H}$  NMR in  $\text{CDCl}_3$   $d$  of PNIPAM-mannose.**

#### **4. Microarray experiments**

A freshly prepared solution of PNIPAM-mannose 200  $\mu\text{M}$  was printed on a thio-activated microarray glass slide. The polymer has been reacting over night in a humid chamber. After washing out the excess of polymer (3 times with 20 mL water), the slide was incubated for 2 h with ConA or ConA-FITC. The excess of ConA was washed out (3 x 20 mL PBS buffer and 1 x 20 mL water). The slide reacted with ConA- FITC was scanned to detect the binding, then washed at 40 °C to prove the possibility to remove the binding. The slide reacted with ConA was washed intensively over night with water at 40 °C, the washing solution concentrated and MALDI analysis was taken. MALDI sample was dissolved in  $\text{NH}_4\text{HCO}_3$  (25 mM) and dried on a 2,5- dihydroxybenzoic acid (DHB) matrix previous prepared (Matrix to sample ratio 1:1; matrix preparation: 5 mg DHB dissolved in 100  $\mu\text{l}$  of 1:1  $\text{CH}_3\text{CN}$  : 0,1% TFA-Water).

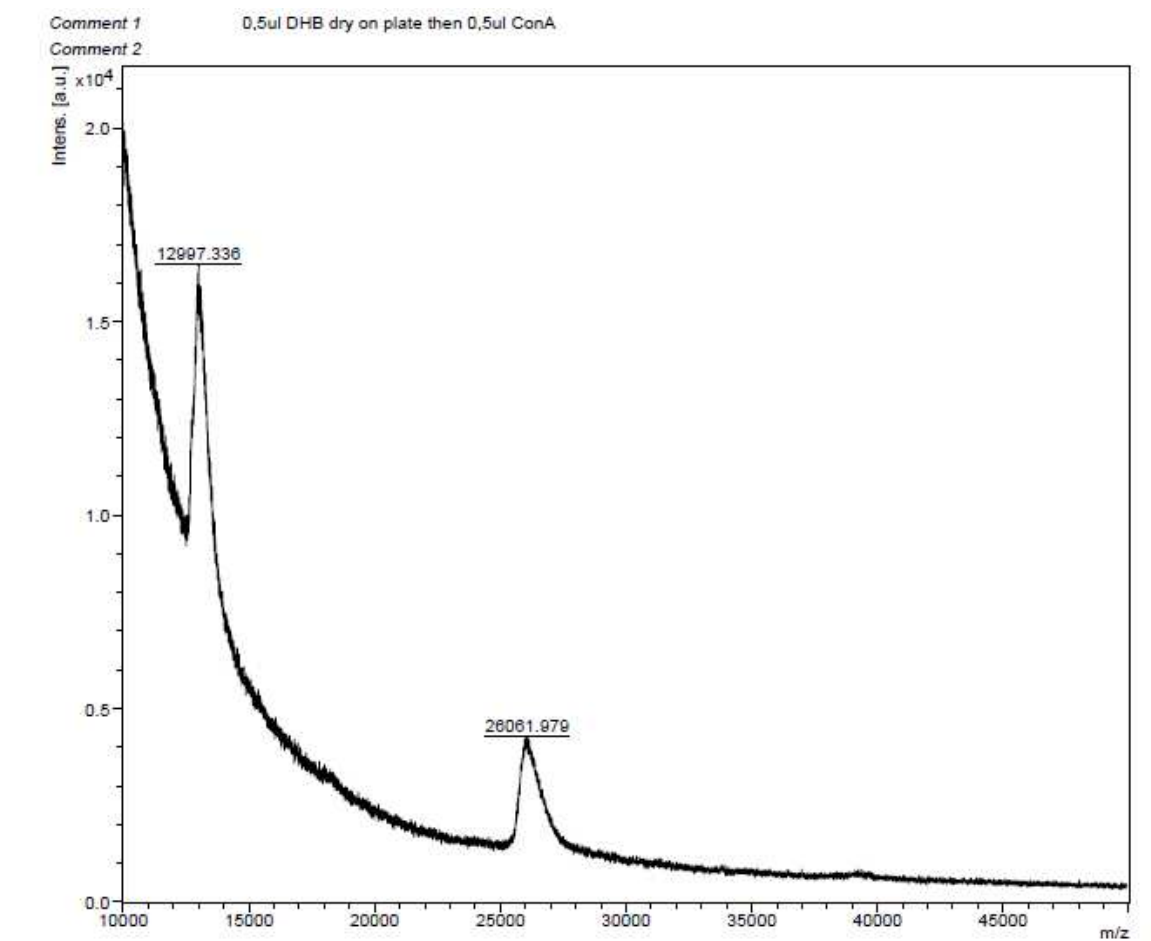

## SI 7. MALDI analysis of ConA released from the microarray slide

- (1) Lai, J. T.; Filla, D.; Shea, R. *Macromolecules* **2002**, 35, 6754-6756.
